# Supplementary material for: Disrupted core-periphery structure of multimodal brain networks in Alzheimer’s disease
Source: PubMed Central journal article supplement (PMC6542619; doi:10.1162/netn_a_00087), 2019-05-01
Supplement: netn-03-635-s001.pdf [file netn-03-635-s001.pdf]

Guillon, J., Chavez, M., Battiston, F., Attal, Y., La Corte, V., Thiebaut de Schotten, M., Dubois, B., Schwartz, D., Colliot, O., & De Vico Fallani, F. (2019). Supporting information for "Disrupted core-periphery structure of multimodal brain networks 2 in Alzheimer's Disease." *Network Neuroscience*, 3(2), 635-652. [https://doi.org/10.1162/netn\\_a\\_00087](https://doi.org/10.1162/netn_a_00087)

## Disrupted core-periphery structure of multimodal brain networks in Alzheimer's Disease (Supplementary Material)

Jeremy Guillon<sup>1,2</sup>, Mario Chavez<sup>3</sup>, Federico Battiston<sup>10,3,2</sup>, Yohan Attal<sup>4</sup>, Valentina La Corte<sup>5,6,7</sup>, Michel Thiebaut de Schotten<sup>1</sup>, Bruno Dubois<sup>8</sup>, Denis Schwartz<sup>9</sup>, Olivier Colliot<sup>2,1</sup>, and Fabrizio De Vico Fallani<sup>2,1,\*</sup>

<sup>1</sup>Institut du Cerveau et de la Moelle Epiniere, ICM, Inserm, U 1127, CNRS, UMR 7225, Sorbonne Universite, F-75013, Paris, France

<sup>2</sup>Inria Paris, Aramis project-team, F-75013, Paris, France

<sup>3</sup>CNRS, UMR 7225, F-75013, Paris, France

<sup>4</sup>MyBrain Technologies, Paris, France

<sup>5</sup>Department of Neurology, Institut de la Memoire et de la Maladie d'Alzheimer - IM2A, Paris, France

<sup>6</sup>INSERM UMR 894, Center of Psychiatry and Neurosciences, Memory and Cognition Laboratory, Paris, France

<sup>7</sup>Institute of Psychology, University Paris Descartes, Sorbonne Paris Cite, France

<sup>8</sup>Institut de la Mémoire et de la Maladie d'Alzheimer - IM2A, AP-HP, Sorbonne Université, Paris, France

<sup>9</sup>Institut du Cerveau et de la Moelle Epiniere, ICM, Inserm U 1127, CNRS UMR 7225, Sorbonne Universite, Ecole Normale Superieure, ENS, Centre MEG-EEG, F-75013, Paris, France

<sup>10</sup>Department of Network and Data Science, Central European University, Budapest 1051, Hungary

\*Corresponding author

December 7, 2018

# 1 Supplementary material

## 2 Supplementary figure

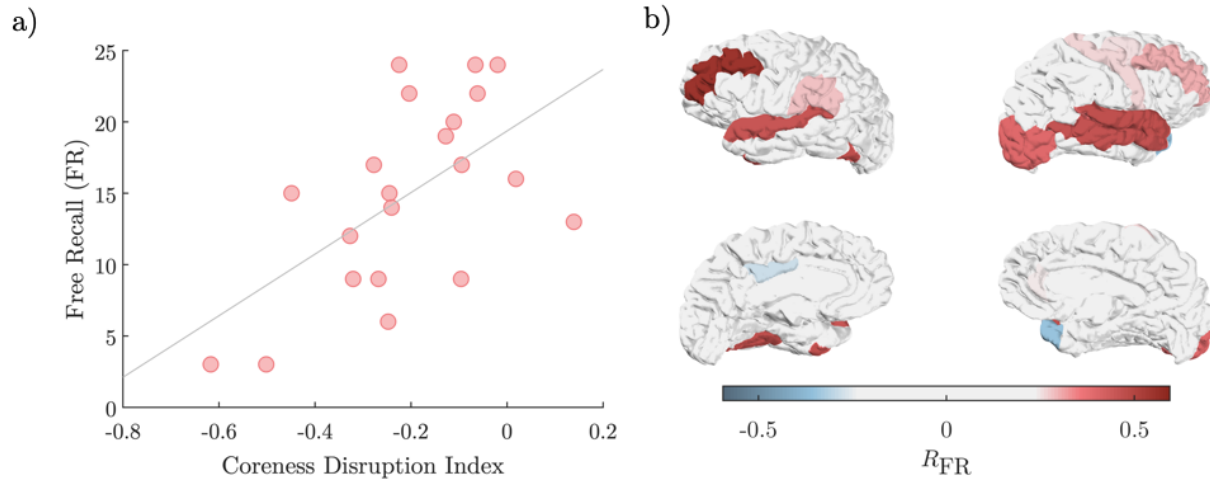

Figure S1: **Correlation between coreness and cognitive/memory deficit.** Panel **a)** shows the values of the free recall (FR) as a function of the coreness disruption index  $\kappa$ . In panel **b)** the Spearman correlation values ( $R_{FR}$ ) between the regional coreness  $C_i$  and the FR values are shown over the Desikan cortical atlas.

## 3 Supplementary tables

Table S1: ADs population coreness disruption indices  $\kappa$  and the associated  $R^2$  of the linear regression.

| Subject ID | $\kappa$ | $R^2$ |
|------------|----------|-------|
| 1          | -0,095   | 0,018 |
| 2          | -0,111   | 0,033 |
| 3          | -0,096   | 0,019 |
| 4          | 0,139    | 0,040 |
| 5          | -0,502   | 0,412 |
| 6          | 0,018    | 0,001 |
| 7          | -0,327   | 0,218 |
| 8          | -0,617   | 0,267 |
| 9          | -0,241   | 0,106 |
| 10         | -0,062   | 0,015 |
| 11         | -0,204   | 0,099 |
| 12         | -0,245   | 0,085 |
| 13         | -0,225   | 0,056 |
| 14         | -0,020   | 0,001 |
| 15         | -0,128   | 0,019 |
| 16         | -0,248   | 0,141 |
| 17         | -0,268   | 0,106 |
| 18         | -0,278   | 0,081 |
| 19         | -0,449   | 0,387 |
| 20         | -0,091   | 0,011 |
| 21         | -0,108   | 0,025 |
| 22         | -0,320   | 0,258 |
| 23         | -0,066   | 0,014 |

Table S2: Average coreness differences and their associated  $p$ -value. Ordered in descending  $\bar{C}_{HC,i}$ . Significant values ( $\alpha_{FDR} = 0,025$ ) are in bold.

| Label                      | $\bar{C}_{AD,i}$ | $\bar{C}_{HC,i}$ | $\bar{C}_{AD,i} - \bar{C}_{HC,i}$ | $p$ -Value   |
|----------------------------|------------------|------------------|-----------------------------------|--------------|
| superiorfrontal R          | 0,923            | 0,952            | -0,029                            | 0,743        |
| precentral R               | 0,883            | 0,921            | -0,038                            | 0,719        |
| superiorfrontal L          | 0,846            | 0,921            | -0,075                            | 0,579        |
| precentral L               | 0,695            | 0,916            | -0,221                            | 0,543        |
| <b>superiortemporal R</b>  | 0,609            | 0,862            | -0,253                            | <b>0,005</b> |
| middletemporal R           | 0,677            | 0,855            | -0,178                            | 0,121        |
| superioparietal R          | 0,781            | 0,806            | -0,025                            | 0,650        |
| <b>lateraloccipital L</b>  | 0,562            | 0,794            | -0,233                            | <b>0,020</b> |
| postcentral R              | 0,696            | 0,778            | -0,082                            | 0,613        |
| <b>lateraloccipital R</b>  | 0,520            | 0,776            | -0,256                            | <b>0,008</b> |
| inferioparietal R          | 0,535            | 0,763            | -0,228                            | 0,071        |
| fusiform L                 | 0,575            | 0,720            | -0,145                            | 0,133        |
| lingual L                  | 0,558            | 0,715            | -0,157                            | 0,210        |
| superiortemporal L         | 0,577            | 0,703            | -0,126                            | 0,316        |
| <b>middletemporal L</b>    | 0,411            | 0,681            | -0,270                            | <b>0,017</b> |
| lingual R                  | 0,445            | 0,660            | -0,214                            | 0,034        |
| fusiform R                 | 0,494            | 0,650            | -0,156                            | 0,203        |
| <b>inferiortemporal R</b>  | 0,344            | 0,641            | -0,297                            | <b>0,002</b> |
| superioparietal L          | 0,632            | 0,637            | -0,005                            | 0,992        |
| precuneus R                | 0,598            | 0,631            | -0,033                            | 0,756        |
| inferiortemporal L         | 0,478            | 0,569            | -0,091                            | 0,288        |
| supramarginal R            | 0,482            | 0,513            | -0,032                            | 0,674        |
| inferioparietal L          | 0,401            | 0,502            | -0,101                            | 0,279        |
| postcentral L              | 0,493            | 0,501            | -0,009                            | 0,787        |
| precuneus L                | 0,296            | 0,437            | -0,142                            | 0,173        |
| insula R                   | 0,404            | 0,398            | 0,006                             | 0,666        |
| <b>pericalcarine L</b>     | 0,126            | 0,379            | -0,254                            | <b>0,012</b> |
| rostralmiddlefrontal R     | 0,342            | 0,334            | 0,008                             | 0,880        |
| pericalcarine R            | 0,176            | 0,304            | -0,128                            | 0,151        |
| insula L                   | 0,369            | 0,290            | 0,079                             | 0,388        |
| supramarginal L            | 0,255            | 0,270            | -0,015                            | 0,771        |
| lateralorbitofrontal L     | 0,223            | 0,254            | -0,031                            | 0,747        |
| rostralmiddlefrontal L     | 0,299            | 0,213            | 0,086                             | 0,349        |
| cuneus R                   | 0,091            | 0,191            | -0,099                            | 0,391        |
| isthmuscingulate L         | 0,134            | 0,186            | -0,052                            | 0,324        |
| posteriorcingulate L       | 0,116            | 0,172            | -0,056                            | 0,559        |
| medialorbitofrontal L      | 0,226            | 0,158            | 0,067                             | 0,221        |
| medialorbitofrontal R      | 0,178            | 0,136            | 0,042                             | 0,709        |
| lateralorbitofrontal R     | 0,109            | 0,131            | -0,022                            | 0,696        |
| isthmuscingulate R         | 0,086            | 0,122            | -0,037                            | 0,907        |
| cuneus L                   | 0,100            | 0,118            | -0,018                            | 0,201        |
| posteriorcingulate R       | 0,174            | 0,115            | 0,059                             | 0,192        |
| caudalmiddlefrontal R      | 0,040            | 0,086            | -0,045                            | 0,966        |
| <b>paracentral R</b>       | 0,151            | 0,076            | 0,074                             | <b>0,022</b> |
| parsopercularis R          | 0,010            | 0,057            | -0,048                            | 0,337        |
| parsopercularis L          | 0,049            | 0,046            | 0,002                             | 1,000        |
| caudalmiddlefrontal L      | 0,047            | 0,041            | 0,006                             | 0,946        |
| bankssts R                 | 0,018            | 0,033            | -0,015                            | 0,326        |
| rostralanteriorcingulate L | 0,032            | 0,031            | 0,001                             | 0,568        |
| bankssts L                 | 0,010            | 0,021            | -0,012                            | 0,588        |
| parahippocampal L          | 0,025            | 0,021            | 0,005                             | 0,928        |
| parstriangularis R         | 0,002            | 0,015            | -0,014                            | 0,754        |
| paracentral L              | 0,036            | 0,015            | 0,021                             | 0,462        |
| parahippocampal R          | 0,035            | 0,014            | 0,021                             | 0,679        |
| parstriangularis L         | 0,007            | 0,010            | -0,003                            | 0,909        |
| caudalanteriorcingulate L  | 0,014            | 0,009            | 0,004                             | 0,629        |
| caudalanteriorcingulate R  | 0,067            | 0,008            | 0,059                             | 0,929        |
| temporalpole L             | 0,008            | 0,007            | 0,001                             | 0,805        |
| rostralanteriorcingulate R | 0,021            | 0,005            | 0,016                             | 0,264        |
| entorhinal L               | 0,004            | 0,005            | -0,001                            | 0,399        |
| transversetemporal L       | 0,000            | 0,004            | -0,004                            | 0,189        |
| frontalpole L              | 0,000            | 0,003            | -0,003                            | 0,368        |
| parsorbitalis L            | 0,004            | 0,003            | 0,001                             | 0,874        |
| temporalpole R             | 0,010            | 0,002            | 0,008                             | 0,682        |
| parsorbitalis R            | 0,001            | 0,002            | -0,002                            | 0,630        |
| transversetemporal R       | 0,001            | 0,002            | -0,002                            | 0,630        |
| entorhinal R               | 0,000            | 0,000            | 0,000                             | NA           |
| frontalpole R              | 0,000            | 0,000            | 0,000                             | NA           |
